# Supplementary material for: MUAC-for-age more useful than absolute MUAC for nutritional surveillance in Somalia: results from nineteen cross-sectional surveys (2007–2016)
Source: PubMed Central journal article supplement (PMC7050741; doi:10.1186/s40795-018-0213-3), 2018-02-21
Supplement: 40795_2018_213_MOESM1_ESM.pdf [file 40795_2018_213_MOESM1_ESM.pdf]

## Additional File 1

**Supplementary table 1:** Comparison of acute malnutrition diagnosis by WHZ and/or absolute MUAC in four Somalian livelihoods

|                                               | Livelihood |                  |             |          |        |
|-----------------------------------------------|------------|------------------|-------------|----------|--------|
|                                               | Total      | Agro-pastoralist | Pastoralist | Riverine | IDPs   |
| <b>Indicators for GAM</b>                     |            |                  |             |          |        |
| WHZ <sub>-2</sub> or/and MUAC <sub>125</sub>  | 51,619     | 9,064            | 16,597      | 5,567    | 20,391 |
| WHZ <sub>-2</sub> only                        | 61.4       | 55.3             | 69.4        | 57.4     | 58.7   |
| MUAC <sub>125</sub> only (%)                  | 20.5       | 24.2             | 16.3        | 23.5     | 21.5   |
| WHZ <sub>-2</sub> & MUAC <sub>125</sub> (%)   | 18.1       | 20.5             | 14.4        | 19.1     | 19.9   |
| <b>Indicators for SAM</b>                     |            |                  |             |          |        |
| WHZ <sub>-3</sub> or/and MUAC <sub>115</sub>  | 12,170     | 2,184            | 3,553       | 1,355    | 5,078  |
| WHZ <sub>-3</sub> only (%)                    | 67.6       | 66.2             | 75          | 65.8     | 63.6   |
| MUAC <sub>115</sub> only (%)                  | 22.8       | 23.9             | 17.9        | 24.3     | 25.3   |
| WHZ <sub>-3</sub> and MUAC <sub>115</sub> (%) | 9.6        | 9.9              | 7.1         | 9.9      | 11.1   |

Proportion of children with acute malnutrition (GAM or SAM) as defined by WHZ and/or absolute MUAC (see Methods section for definitions) that are diagnosed as malnourished by WHZ only, by absolute MUAC only, or by both criteria simultaneously.

**Supplementary table 2:** Comparison of acute malnutrition diagnosis by WHZ and/or MUACAZ in four Somalian livelihoods

|                                                | Livelihood |                  |             |          |        |
|------------------------------------------------|------------|------------------|-------------|----------|--------|
|                                                | Total      | Agro-pastoralist | Pastoralist | Riverine | IDPs   |
| <b>Indicators for GAM</b>                      |            |                  |             |          |        |
| WHZ <sub>-2</sub> or/and MUACAZ <sub>-2</sub>  | 63,478     | 11,757           | 20,319      | 7,105    | 24,297 |
| WHZ <sub>-2</sub> only (%)                     | 36.4       | 30.9             | 41          | 31.9     | 36.5   |
| MUACAZ <sub>-2</sub> only (%)                  | 35.4       | 41.6             | 31.6        | 40.1     | 34.1   |
| WHZ <sub>-2</sub> & MUACAZ <sub>-2</sub> (%)   | 28.3       | 27.5             | 27.4        | 28.1     | 29.4   |
| <b>Indicators for SAM</b>                      |            |                  |             |          |        |
| WHZ <sub>-3</sub> or/and MUACAZ <sub>-3</sub>  | 15,052     | 3,060            | 4,403       | 1,729    | 5,860  |
| WHZ <sub>-3</sub> only (%)                     | 49.4       | 41.9             | 54.5        | 45.6     | 50.6   |
| MUACAZ <sub>-3</sub> only (%)                  | 37.6       | 45.7             | 33.8        | 40.7     | 35.3   |
| WHZ <sub>-3</sub> and MUACAZ <sub>-3</sub> (%) | 13.0       | 12.4             | 11.7        | 13.8     | 14.2   |

Proportion of children with acute malnutrition (GAM or SAM) as defined by WHZ and/or absolute MUACAZ (see Methods section for definitions) that are diagnosed as malnourished by WHZ only, by MUACAZ only, or by both criteria simultaneously.

**Supplementary table 3** Factors associated with GAM diagnosis based on WHZ, absolute MUAC and MUACAZ by livelihood

| <b>S3-1</b> Factors associated with the diagnosis of GAM among agro-pastoralists (n=42 132) |                   |       |                  |                     |       |                  |                      |       |                  |  |
|---------------------------------------------------------------------------------------------|-------------------|-------|------------------|---------------------|-------|------------------|----------------------|-------|------------------|--|
|                                                                                             | WHZ <sub>-2</sub> |       |                  | MUAC <sub>125</sub> |       |                  | MUACAZ <sub>-2</sub> |       |                  |  |
|                                                                                             | %                 | n     | Adj.OR           | %                   | n     | Adj.OR           | %                    | n     | Adj.OR           |  |
| Sex                                                                                         |                   |       |                  |                     |       |                  |                      |       |                  |  |
| Male                                                                                        | 18.7              | 3 987 | Ref.             | 9.2                 | 1 966 | Ref.             | 21.5                 | 4 583 | Ref.             |  |
| Female                                                                                      | 13.9              | 2 882 | 0.70 (0.67-0.74) | 10.0                | 2 089 | 1.21 (1.13-1.29) | 17.0                 | 3 540 | 0.80 (0.76-0.84) |  |
| Age                                                                                         |                   |       |                  |                     |       |                  |                      |       |                  |  |
| <24 months                                                                                  | 15.6              | 2 215 | Ref.             | 17.5                | 2 481 | Ref.             | 16.3                 | 2 314 | Ref.             |  |
| >=24 months                                                                                 | 16.7              | 4 654 | 1.08 (1.02-1.14) | 5.6                 | 1 574 | 0.27(0.25-0.29)  | 20.8                 | 5 809 | 1.34 (1.27-1.41) |  |
| Stunting                                                                                    |                   |       |                  |                     |       |                  |                      |       |                  |  |
| No                                                                                          | 16.0              | 4 975 | Ref.             | 7.4                 | 2 289 | Ref.             | 15.1                 | 4 700 | Ref.             |  |
| Yes                                                                                         | 17.1              | 1 894 | 1.05 (0.99-1.11) | 16.0                | 1 766 | 2.62 (2.45-2.81) | 31.0                 | 3 423 | 2.46 (2.34-2.59) |  |
| Total                                                                                       | 16.3              | 6 869 |                  | 9.6                 | 4 055 |                  | 19.3                 | 8,123 |                  |  |

**S3-2** Factors associated with the diagnosis of GAM in pastoralists (n=89 876)

|             | WHZ <sub>-2</sub> |        |                  | MUAC <sub>125</sub> |       |                  | MUACAZ <sub>-2</sub> |        |                  |  |
|-------------|-------------------|--------|------------------|---------------------|-------|------------------|----------------------|--------|------------------|--|
|             | %                 | n      | Adj.OR           | %                   | n     | Adj.OR           | %                    | n      | Adj.OR           |  |
| Sex         |                   |        |                  |                     |       |                  |                      |        |                  |  |
| Male        | 17.5              | 8 079  | Ref.             | 5.1                 | 2 353 | Ref.             | 14.6                 | 6 774  | Ref.             |  |
| Female      | 13.4              | 5 820  | 0.74 (0.71-0.76) | 6.3                 | 2 729 | 1.36 (1.28-1.44) | 12.0                 | 5 206  | 0.83 (0.80-0.87) |  |
| Age         |                   |        |                  |                     |       |                  |                      |        |                  |  |
| <24 months  | 12.4              | 3 670  | Ref.             | 11.3                | 3 332 | Ref.             | 10.1                 | 2 968  | Ref.             |  |
| >=24 months | 17.0              | 10 229 | 1.44 (1.38-1.50) | 2.9                 | 1 750 | 0.23 (0.22-0.25) | 14.9                 | 9 012  | 1.61 (1.54-1.68) |  |
| Stunting    |                   |        |                  |                     |       |                  |                      |        |                  |  |
| No          | 15.2              | 11 958 | Ref.             | 4.7                 | 3 688 | Ref.             | 11.6                 | 9 132  | Ref.             |  |
| Yes         | 17.2              | 1 941  | 1.13 (1.07-1.19) | 12.3                | 1 394 | 2.98 (2.78-3.19) | 25.2                 | 2 848  | 2.56 (2.44-2.69) |  |
| Total       | 15.5              | 13 899 |                  | 5.7                 | 5 082 |                  | 13.3                 | 11 980 |                  |  |

**S3-3** Factors associated with the diagnosis of GAM in riverine (n=26 603)

|             | WHZ <sub>-2</sub> |       |                   | MUAC <sub>125</sub> |       |                  | MUACAZ <sub>-2</sub> |       |                  |  |
|-------------|-------------------|-------|-------------------|---------------------|-------|------------------|----------------------|-------|------------------|--|
|             | %                 | n     | Adj.OR            | %                   | n     | Adj.OR           | %                    | n     | Adj.OR           |  |
| Sex         |                   |       |                   |                     |       |                  |                      |       |                  |  |
| Male        | 18.0              | 2 435 | Ref.              | 8.1                 | 1 103 | Ref.             | 19.9                 | 2 695 | Ref.             |  |
| Female      | 14.0              | 1 823 | 0.74 5(0.69-0.79) | 9.7                 | 1 271 | 1.39 (1.27-1.52) | 16.5                 | 2 146 | 0.84 (0.79-0.90) |  |
| Age         |                   |       |                   |                     |       |                  |                      |       |                  |  |
| <24 months  | 16.7              | 1 479 | Ref.              | 18.1                | 1 600 | Ref.             | 16.3                 | 1 447 | Ref.             |  |
| >=24 months | 15.7              | 2 779 | 0.92 (0.86-0.99)  | 4.4                 | 774   | 0.21 (0.19-0.23) | 19.1                 | 3 394 | 1.27 (1.18-1.36) |  |
| Stunting    |                   |       |                   |                     |       |                  |                      |       |                  |  |
| No          | 16.3              | 3 183 | Ref.              | 6.9                 | 1 338 | Ref.             | 14.8                 | 2 877 | Ref.             |  |
| Yes         | 15.1              | 1 075 | 0.88 (0.82-0.95)  | 14.5                | 1 036 | 2.33 (2.13-2.55) | 27.6                 | 1 964 | 2.19 (2.05-2.34) |  |
| Total       | 16.0              | 4 258 |                   | 8.9                 | 2 374 |                  | 18.2                 | 4 841 |                  |  |

**S3-4** Factors associated with the diagnosis of GAM in IDPs (n=97 012)

|  | WHZ <sub>-2</sub> |  |  | MUAC <sub>125</sub> |  |  | MUACAZ <sub>-2</sub> |  |  |
|--|-------------------|--|--|---------------------|--|--|----------------------|--|--|
|--|-------------------|--|--|---------------------|--|--|----------------------|--|--|

|                 | %    | n      | Adj.OR           | %    | n     | Adj.OR           | %    | n      | Adj.OR           |
|-----------------|------|--------|------------------|------|-------|------------------|------|--------|------------------|
| <b>Sex</b>      |      |        |                  |      |       |                  |      |        |                  |
| Male            | 18.9 | 9 148  | Ref.             | 7.7  | 3 728 | Ref.             | 17.6 | 8 546  | Ref.             |
| Female          | 14.2 | 6 866  | 0.71 (0.69-0.74) | 9.7  | 4 699 | 1.46 (1.39-1.53) | 14.2 | 6 878  | 0.82 (0.79-0.85) |
| <b>Age</b>      |      |        |                  |      |       |                  |      |        |                  |
| <24 months      | 16.4 | 6 194  | Ref.             | 19.4 | 6 538 | Ref.             | 17.6 | 5 935  | Ref.             |
| >=24 months     | 15.5 | 9 820  | 0.82 (0.79-0.85) | 3.0  | 1 889 | 0.13 (0.13-0.14) | 15.0 | 9 489  | 0.89 (0.86-0.93) |
| <b>Stunting</b> |      |        |                  |      |       |                  |      |        |                  |
| No              | 16.0 | 11 877 | Ref.             | 6.0  | 4 475 | Ref.             | 12.2 | 9 070  | Ref.             |
| Yes             | 18.1 | 4 137  | 1.11 (1.06-1.15) | 17.2 | 3 952 | 3.12 (2.97-3.27) | 27.7 | 6 354  | 2.69 (2.59-2.79) |
| Total           | 16.5 | 16,014 |                  | 8.7  | 8 427 |                  | 15.9 | 15 424 |                  |

**Supplementary table 4** Factors associated with SAM diagnosis based on WHZ, MUAC and MUACAZ by livelihood

**S4-1** Factors associated with the diagnosis of SAM among agro-pastoralists (n=42,132)

|                 | WHZ <sub>3</sub> |       |                  | MUAC <sub>115</sub> |     |                  | MUACAZ <sub>3</sub> |       |                  |
|-----------------|------------------|-------|------------------|---------------------|-----|------------------|---------------------|-------|------------------|
|                 | %                | n     | Adj.OR           | %                   | n   | Adj.OR           | %                   | n     | Adj.OR           |
| <b>Sex</b>      |                  |       |                  |                     |     |                  |                     |       |                  |
| Male            | 4.7              | 996   | Ref.             | 1.6                 | 331 | Ref.             | 5.0                 | 1 055 | Ref.             |
| Female          | 3.2              | 667   | 0.68 (0.62-0.76) | 2.0                 | 407 | 0.42 (1.22-1.65) | 3.5                 | 721   | 0.75 (0.68-0.82) |
| <b>Age</b>      |                  |       |                  |                     |     |                  |                     |       |                  |
| <24 months      | 4.3              | 602   | Ref.             | 3.7                 | 520 | Ref.             | 3.5                 | 499   | Ref.             |
| >=24 months     | 3.8              | 1 061 | 0.89 (0.80-0.98) | 0.8                 | 218 | 0.20 (0.17-0.23) | 4.6                 | 1,277 | 1.29 (1.16-1.44) |
| <b>Stunting</b> |                  |       |                  |                     |     |                  |                     |       |                  |
| No              | 3.7              | 1 161 | Ref.             | 1.3                 | 390 | Ref.             | 2.9                 | 892   | Ref.             |
| Yes             | 4.5              | 502   | 1.19 (1.07-1.32) | 3.2                 | 348 | 2.81 (2.42-3.26) | 8.0                 | 884   | 2.86 (2.60-3.15) |
| Total           | 4.0              | 1 663 |                  | 1.8                 | 738 |                  | 4.2                 | 1 776 |                  |

**S42** Factors associated with the diagnosis of SAM in pastoralists (n=89 876)

|                 | WHZ <sub>3</sub> |       |                  | MUAC <sub>115</sub> |     |                  | MUACAZ <sub>3</sub> |       |                  |
|-----------------|------------------|-------|------------------|---------------------|-----|------------------|---------------------|-------|------------------|
|                 | %                | n     | Adj.OR           | %                   | n   | Adj.OR           | %                   | n     | Adj.OR           |
| <b>Sex</b>      |                  |       |                  |                     |     |                  |                     |       |                  |
| Male            | 3.9              | 1 810 | Ref.             | 0.9                 | 413 | Ref.             | 2.6                 | 1 211 | Ref.             |
| Female          | 2.5              | 1 106 | 0.65 (0.60-0.70) | 1.1                 | 475 | 1.40 (1.22-1.60) | 1.8                 | 793   | 0.75 (0.69-0.82) |
| <b>Age</b>      |                  |       |                  |                     |     |                  |                     |       |                  |
| <24 months      | 3.1              | 928   | Ref.             | 2.1                 | 621 | Ref.             | 1.9                 | 572   | Ref.             |
| >=24 months     | 3.3              | 1 988 | 1.05 (0.97-1.14) | 0.4                 | 267 | 0.21 (0.18-0.24) | 2.4                 | 1 432 | 1.27 (1.15-1.40) |
| <b>Stunting</b> |                  |       |                  |                     |     |                  |                     |       |                  |
| No              | 3.1              | 2 468 | Ref.             | 0.7                 | 559 | Ref.             | 1.7                 | 1 316 | Ref.             |
| Yes             | 4.0              | 448   | 1.22 (1.10-1.35) | 2.9                 | 329 | 4.25 (3.70-4.89) | 6.1                 | 688   | 3.73 (3.39-4.10) |
| Total           | 3.2              | 2 916 |                  | 1.0                 | 888 |                  | 2.2                 | 2 004 |                  |

**S4-3** Factors associated with the diagnosis of SAM in riverine (n=26 603)

|  | WHZ <sub>3</sub> |   |        | MUAC <sub>115</sub> |   |        | MUACAZ <sub>3</sub> |   |        |
|--|------------------|---|--------|---------------------|---|--------|---------------------|---|--------|
|  | %                | n | Adj.OR | %                   | n | Adj.OR | %                   | n | Adj.OR |

|             |     |       |                  |     |     |                  |     |     |                  |  |
|-------------|-----|-------|------------------|-----|-----|------------------|-----|-----|------------------|--|
| Sex         |     |       |                  |     |     |                  |     |     |                  |  |
| Male        | 4.6 | 622   | Ref.             | 1.6 | 216 | Ref.             | 4.1 | 555 | Ref.             |  |
| Female      | 3.1 | 404   | 0.67 (0.59-0.76) | 1.9 | 247 | 1.39 (1.15-1.67) | 3.0 | 386 | 0.78 (0.68-0.89) |  |
| Age         |     |       |                  |     |     |                  |     |     |                  |  |
| <24 months  | 4.6 | 403   | Ref.             | 4.1 | 362 | Ref.             | 3.9 | 348 | Ref.             |  |
| >=24 months | 3.5 | 623   | 0.77 (0.67-0.87) | 0.6 | 101 | 0.14 (0.11-0.17) | 3.3 | 593 | 0.89 (0.78-1.02) |  |
| Stunting    |     |       |                  |     |     |                  |     |     |                  |  |
| No          | 3.8 | 743   | Ref.             | 1.2 | 237 | Ref.             | 2.5 | 486 | Ref.             |  |
| Yes         | 4.0 | 283   | 0.99 (0.86-1.14) | 3.2 | 226 | 2.58 (2.14-3.11) | 6.4 | 455 | 2.59 (2.27-2.95) |  |
| Total       | 3.9 | 1 026 |                  | 1.7 | 463 |                  | 3.5 | 941 |                  |  |

#### S4-4 Factors associated with the diagnosis of SAM in IDPs (n=97 012)

|             | Weight-for-height |       |                  | MUAC <sub>115</sub> |       |                  | MUACAZ <sub>-3</sub> |       |                  |  |
|-------------|-------------------|-------|------------------|---------------------|-------|------------------|----------------------|-------|------------------|--|
|             | %                 | n     | Adj.OR           | %                   | n     | Adj.OR           | %                    | n     | Adj.OR           |  |
| Sex         |                   |       |                  |                     |       |                  |                      |       |                  |  |
| Male        | 4.7               | 2 266 | Ref.             | 1.6                 | 783   | Ref.             | 3.5                  | 1 698 | Ref.             |  |
| Female      | 3.2               | 1 527 | 0.67 (0.63-0.71) | 2.2                 | 1 067 | 1.55 (1.41-1.71) | 2.5                  | 1 199 | 0.76 (0.71-0.82) |  |
| Age         |                   |       |                  |                     |       |                  |                      |       |                  |  |
| <24 months  | 5.2               | 1 758 | Ref.             | 4.7                 | 1 578 | Ref.             | 4.2                  | 1 417 | Ref.             |  |
| >=24 months | 3.2               | 2 035 | 0.61 (0.57-0.65) | 0.4                 | 272   | 0.10 (0.08-0.11) | 2.3                  | 1 480 | 0.61 (0.56-0.65) |  |
| Stunting    |                   |       |                  |                     |       |                  |                      |       |                  |  |
| No          | 3.7               | 2 738 | Ref.             | 1.2                 | 869   | Ref.             | 1.9                  | 1 384 | Ref.             |  |
| Yes         | 4.6               | 1 055 | 1.16 (1.08-1.25) | 4.3                 | 981   | 3.37 (3.07-3.71) | 6.6                  | 1 513 | 3.48 (3.23-3.75) |  |
| Total       | 3.9               | 3 793 |                  | 1.9                 | 1 850 |                  | 3.0                  | 2 897 |                  |  |
